# Supplementary material for: Current smoking is not associated with COVID-19
Source: PubMed Central journal article supplement — Eur Respir J. 2020 Jun 4;55(6):2001290. doi: 10.1183/13993003.01290-2020 (PMC7191113; doi:10.1183/13993003.01290-2020), 2020-06-04
Supplement: ERJ-01290-2020.Shareable.pdf [file ERJ-01290-2020.Shareable.pdf]

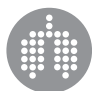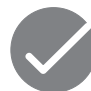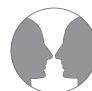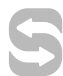

SHAREABLE PDF

# Current smoking is not associated with COVID-19

Marco Rossato 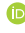, Lucia Russo, Sara Mazzocut, Angelo Di Vincenzo, Paola Fioretto and Roberto Vettor

**Affiliation:** Clinica Medica 3, Dept of Medicine – DIMED, University-Hospital of Padova, Padova, Italy.

**Correspondence:** Marco Rossato, Clinica Medica 3, Dept of Medicine – DIMED, University-Hospital of Padova, Via Giustiniani, 2, 35128 Padova, Italy. E-mail: marco.rossato@unipd.it

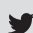

@ERSpublications

**Despite the main complications of SARS-CoV-2 infection regard lung involvement, the prevalence of current smoking in COVID-19 patients is very low, thus questioning the role of coexisting active smoking as a risk factor for COVID-19 pneumonia** <https://bit.ly/3eUnl1R>

**Cite this article as:** Rossato M, Russo L, Mazzocut S, *et al.* Current smoking is not associated with COVID-19. *Eur Respir J* 2020; 55: 2001290 [<https://doi.org/10.1183/13993003.01290-2020>].

This single-page version can be shared freely online.

## To the Editor:

We have read with interest the paper by LEUNG *et al.* [1] recently published in the *European Respiratory Journal*, reporting a higher expression of the protein angiotensin-converting enzyme II (ACE-2) in the small airway epithelia of smokers and COPD patients with putatively important implications for coronavirus disease 2019 (COVID-19) patients, since ACE-2 has been shown to be the receptor utilised by severe acute respiratory syndrome coronavirus 2 (SARS-CoV-2) to enter the host cell [2]. Furthermore, the authors reported that current smokers showed a higher expression of ACE-2 gene expression than non-smokers, concluding that the increased ACE-2 expression in smokers might predispose to increased risk of SARS-CoV-2 infection [1].
